# Supplementary material for: Nitric Oxide Resistance in Leishmania (Viannia) braziliensis Involves Regulation of Glucose Consumption, Glutathione Metabolism and Abundance of Pentose Phosphate Pathway Enzymes
Source: MDPI journal article supplement (doi:10.3390/antiox11020277), 2022-01-29
Supplement: s1 [file s1]

**Supplementary Table S2.** Summary of general information about the proteomes of *Leishmania braziliensis* strains resistant or susceptible to NO.

|                                             | <b>2853</b><br>NO-resistant   | <b>2853+NO</b><br>NO-resistant<br>challenged with<br>NaNO <sub>2</sub> | <b>2856</b><br>NO-susceptible | <b>2856+NO</b><br>NO-susceptible<br>challenged with<br>NaNO <sub>2</sub> |
|---------------------------------------------|-------------------------------|------------------------------------------------------------------------|-------------------------------|--------------------------------------------------------------------------|
| <b>Biological replicates</b>                | 4                             | 4                                                                      | 4                             | 4                                                                        |
| <b>Peptides identified</b>                  | 31019 ± 1288                  | 37006 ± 846                                                            | 41660 ± 759                   | 42050 ± 1373                                                             |
| <b>Protein groups identified</b>            | 5707                          | 5960                                                                   | 6002                          | 6012                                                                     |
| <b>Total protein per cell</b>               | 3.3 ± 0.11 pg                 | 4.3 ± 0.08 pg                                                          | 4.4 ± 0.2 pg                  | 4.4 ± 0.1 pg                                                             |
| <b>Total protein molecules per parasite</b> | 5.42 ± 0.16 x 10 <sup>7</sup> | 6.84 ± 0.15 x 10 <sup>7</sup>                                          | 7.10 ± 0.28 x 10 <sup>7</sup> | 7.04 ± 0.19 x 10 <sup>7</sup>                                            |
